# Supplementary material for: Designing an Informative App for Neurorehabilitation: A Feasibility and Satisfaction Study by Physiotherapists
Source: MDPI journal article supplement (doi:10.3390/healthcare11182549), 2023-09-14
Supplement: s1 [file s1]

**Table S1. List of apps with application in neurorehabilitation.**

| Application Name             | Patient / Professional                | Payment / Free | Short description                        | Classification     | Pathology            |
|------------------------------|---------------------------------------|----------------|------------------------------------------|--------------------|----------------------|
| AbaPlanet                    | Patients, relatives and professionals | Free           | Improves communication                   | Treatment (Speech) | Cognitive impairment |
| Ablah                        | Patients and relatives                | Paid           | Improves communication                   | Treatment (Speech) | Cognitive impairment |
| Aemps CIMA                   | Professionals                         | Free           | Prescribing information                  | Informative        | All diseases         |
| Alzheimer                    | Patients and relatives                | Free           | Information about the disease            | Specific           | Alzheimer            |
| Alzheimer app                | Patients and relatives                | Free           | Treatment and understanding of pathology | Specific           | Alzheimer            |
| Alzheimer App for Caregivers | Patients and relatives                | Free           | Information about the disease            | Specific           | Alzheimer            |
| Alzheimer's Daily Companion  | Patients, relatives and professionals | Free           | Information about the disease            | Specific           | Alzheimer            |
| Alzheimer Info               | Patients and                          | Free           | Information about                        | Specific           | Alzheimer            |

|                               |                                       |      |                                                    |                           |                            |
|-------------------------------|---------------------------------------|------|----------------------------------------------------|---------------------------|----------------------------|
|                               | relatives                             |      | the disease                                        |                           |                            |
| Alzheimer Info & Exercises    | Patients and relatives                | Free | Information about the disease                      | Specific and Treatment    | Alzheimer                  |
| AMiAlcance                    | Patients and relatives                | Free | Improving the use of technology                    | Healthy habits.           | cognitive impairment       |
| Autism. Discover emotions     | Patients, relatives and professionals | Free | Improving communication                            | Treatment                 | cognitive impairment       |
| Autismo iHelp                 | Patients, relatives and professionals | Free | Improving communication                            | Treatment (Speech)        | cognitive impairment       |
| Baby Exercises and Activities | Patients, relatives and professionals | Free | Exercises for pediatric stimulation                | Informative and treatment | Global developmental delay |
| Baby's Motor Milestores       | Patients, relatives and professionals | Free | Milestones of baby motor development               | Informative               | Global developmental delay |
| BabySparks                    | Patients, relatives and professionals | Free | Milestones of baby motor development and exercises | Informative and treatment | Global developmental delay |
| Beats Medical                 | Patients, relatives and professionals | Free | Mobility treatment, skills and speech              | Assessment and treatment  | Parkinson                  |

|                                  |                                       |      |                                            |                       |              |
|----------------------------------|---------------------------------------|------|--------------------------------------------|-----------------------|--------------|
| Drinking water (Water your body) | Patients and relatives                | Free | Improving health habits (hydration)        | Healthy habits        | All diseases |
| Brainyapp                        | Patients and relatives                | Free | Memory training                            | Treatment (Cognitive) | All diseases |
| Cath my pain                     | Patients and relatives                | Free | Pain's diary                               | Assessment            | All diseases |
| CareZone                         | Professionals                         | Free | Prescribing information                    | Informative           | All diseases |
| Cerebral Palsy                   | Patients and relatives                | Free | Treatment and understanding of the disease | Specific              | Brain Damage |
| Clinometer                       | Professionals                         | Paid | Work tool                                  | Assessment            | All diseases |
| CNS Mobile                       | Patients, relatives and professionals | Free | Treatment and understanding of the disease | Specific              | Brain Damage |
| ICTUS Code                       | Patients and relatives                | Free | Information about the disease              | Specific              | Stroke       |
| Comfort Zone Check-in            | Patients and relatives                | Free | Patient's location                         | Healthy habits        | All diseases |
| Calorie Counter                  | Patients and                          | Free | Improving healthy                          | Healthy habits        | All diseases |

|                                               |                                       |                              |                                         |                 |                    |
|-----------------------------------------------|---------------------------------------|------------------------------|-----------------------------------------|-----------------|--------------------|
|                                               | relatives                             |                              | habits (Food)                           |                 |                    |
| Control EM                                    | Patients and relatives                | Free                         | Information about the disease           | Specific        | Multiple sclerosis |
| Daño Cerebral (Brain Damage)                  | Patients, relatives and professionals | Free                         | Treatment and understanding the disease | Specific        | Brain Damage       |
| Dexterity.Fine motor skills development       | Patients, relatives and professionals | Paid                         | Activities for hand treatment           | Informative     | All diseases       |
| DMD guide                                     | Patients, relatives and professionals | Free                         | Treatment and understanding the disease | Specific        | Muscular dystrophy |
| Dr. Goniometer                                | Professionals                         | Paid                         | Work tool                               | Assessment      | All diseases       |
| EDSS Calculator                               | Professionals                         | Paid (iOS)<br>Free (Android) | Work tool                               | Assessment      | All diseases       |
| El círculo de la Salud (The Circle of Health) | Patients and relatives                | Free                         | Improved lifestyle                      | Healthy habits. | All diseases       |
| MS All in One                                 | Patients, relatives and professionals | Free                         | Information about MS                    | Specific        | Multiple sclerosis |
| Endomondo                                     | Patients and                          | Free                         | Improving healthy                       | Healthy habits. | All diseases       |

|                                                                              | relatives                             |      | habits (exercise)                             |                                      |                            |
|------------------------------------------------------------------------------|---------------------------------------|------|-----------------------------------------------|--------------------------------------|----------------------------|
| Epocrates                                                                    | Professionals                         | Free | Medical<br>Informative                        | Informative                          | All diseases               |
| Glasgow Coma Scale                                                           | Professionals                         | Free | Work tool                                     | Assessment                           | All diseases               |
| Stroke Scale NIHSS                                                           | Professionals                         | Paid | Work tool                                     | Assessment                           | Stroke                     |
| Escala RACE (RACE scale)                                                     | Professionals                         | Free | Work tool                                     | Assessment                           | Stroke                     |
| Esclerosis múltiple @Point de Care TM (Multiple Sclerosis @Point de Care TM) | Professionals                         | Free | Information about the disease                 | Specific                             | Multiple sclerosis         |
| Escoliómetro HD (scoliometer HD)                                             | Professionals                         | Paid | Work tools                                    | Assessment                           | All diseases               |
| Estimulación Temprana para Bebés (Early Stimulation Baby)                    | Patients and relatives                | Free | Useful information for the baby's development | Informative                          | Global developmental delay |
| EVA Facial Mouse                                                             | Patients and relatives                | Free | Helps the patient                             | Healthy lifestyles and treatment     | All diseases               |
| Fisioterapia a tu alcance (Physiotherapy at your fingertips)                 | Patients, relatives and professionals | Free | Information                                   | Informative and treatment (Physical) | All diseases               |

|                                                                      |                                          |      |                                        |                                            |                         |
|----------------------------------------------------------------------|------------------------------------------|------|----------------------------------------|--------------------------------------------|-------------------------|
| Fisioterapia FF<br>(physiotherapy FF)                                | Professionals                            | Free | Information                            | Informative                                | All diseases            |
| Fisioterapia Guía de ayuda<br>(Physiotherapy Help Guide)             | Professionals                            | Free | Information                            | Informative                                | All diseases            |
| Fisioterapia respiratoria<br>(Respiratory physiotherapy)             | Professionals                            | Paid | Work tool                              | Assessment                                 | All diseases            |
| Fit Brains Trainer                                                   | Patients and<br>relatives                | Free | Cognitive training                     | Treatment                                  | All diseases            |
| Goniometer Records                                                   | Professionals                            | Free | Work tools                             | Assessment                                 | All diseases            |
| Goniómetro Pro Gratuito<br>(Free Pro Goniometer)                     | Professionals                            | Free | Work tools                             | Assessment                                 | All diseases            |
| Google Fit                                                           | Patients and<br>relatives                | Free | Improving healthy<br>habits (exercise) | Healthy habits                             | All diseases            |
| Guía de actos fisioterápicos<br>(Guide of Physiotherapeutic<br>Acts) | Patients, relatives<br>and professionals | Free | Information                            | Informative and<br>treatment<br>(Physical) | All diseases            |
| Guía salud (health guide)                                            | Professionals                            | Free | Information                            | Informative                                | All diseases            |
| Headache Diary                                                       | Patients and<br>relatives                | Paid | Pain's diary                           | Assessment                                 | Headache or<br>migraine |
| Human Anatomy Atlas 3D.                                              | Professionals                            | Free | Work tools                             | Informative                                | All diseases            |

|                                  |                                       |      |                                         |                    |                            |
|----------------------------------|---------------------------------------|------|-----------------------------------------|--------------------|----------------------------|
| Visible body                     |                                       |      |                                         |                    |                            |
| ICTUS                            | Patients and relatives                | Free | Information about the disease           | Specific           | Stroke                     |
| ICTUS care                       | Patients and relatives                | Free | Treatment and understanding the disease | Specific           | Stroke                     |
| IDoctus                          | Professionals                         | Free | Work tools                              | Informative        | All diseases               |
| INeuro                           | Professionals                         | Paid | Information                             | Informative        | All diseases               |
| IPediatric                       | Patients and relatives                | Paid | Information                             | Informative        | All diseases               |
| ISecuencias                      | Patients, relatives and professionals | Paid | Improving living habits (learning)      | Healthy habits.    | All diseases               |
| Kinedu                           | Patients, relatives and professionals | Free | Early stimulation                       | Treatment          | Global developmental delay |
| LetMeTalk: Talker SAAC, CAA, SAC | Patients and relatives                | Free | Improves communication                  | Treatment (Speech) | cognitive impairment       |
| Lift Pulse                       | Patients and relatives                | Free | Motion data recording                   | Assessment         | Parkinson                  |
| To Do Lists                      | Patients and                          | Paid | Improved lifestyle                      | Healthy habits.    | All diseases               |

|                       |                                       |      |                                  |                                    |                        |
|-----------------------|---------------------------------------|------|----------------------------------|------------------------------------|------------------------|
|                       | relatives                             |      |                                  |                                    |                        |
| ListenMee App         | Patients and relatives                | Paid | Improved motion by auditory cues | Treatment                          | Parkinson              |
| Medical tols          | Professionals                         | Free | Work tools                       | Assessment                         | All diseases           |
| Medisafe              | Patients and relatives                | Free | Medication reminder              | Healthy habits.                    | All diseases           |
| Medscape              | Professionals                         | Free | Work tools                       | Informative                        | All diseases           |
| Mememtum              | Patients, relatives and professionals | Paid | Work tools                       | Assessment and Treatment(Physical) | Parkinson              |
| Memento               | Patients and relatives                | Free | Working memory                   | Treatment (Cognitive)              | cognitive impairment   |
| Metrónomo (Metronome) | Patients, relatives and professionals | Free | Work tools                       | Treatment                          | Parkinson              |
| Migrapp               | Patients and relatives                | Free | Pain's diary                     | Assessment                         | Headache or migraine   |
| MindMate              | Patients, relatives and professionals | Free | Information and exercises        | Informative and Treatment          | Alzheimer and dementia |
| Mirror Therapy        | Patients, relatives and professionals | Paid | Mirror Therapy                   | Treatment                          | All diseases           |



|                             |                                       |      |                                           |                        |                    |
|-----------------------------|---------------------------------------|------|-------------------------------------------|------------------------|--------------------|
| Mobile MIM                  | Professionals                         | Free | Work tools                                | Assessment             | All diseases       |
| MSAA Self Care Manager      | Patients and relatives                | Free | Information about the disease             | Specific               | Multiple sclerosis |
| MS Diagnosis                | Professionals                         | Free | Assessment Tool                           | Assessment             | Multiple sclerosis |
| MS Diagnosis and Management | Patients, relatives and professionals | Free | Information and exercises                 | specific and treatment | Multiple sclerosis |
| Multiple Sclerosis          | Patients, relatives and professionals | Free | Information and exercises for MS patients | specific and treatment | Multiple sclerosis |
| Muscle Premium              | Professionals                         | Free | Work tools                                | Informative            | All diseases       |
| Muscular Dystrophy          | Patients and relatives                | Free | Treatment and understanding the disease   | Specific               | Muscular dystrophy |
| Muscular Dystrophy Info     | Patients and relatives                | Free | Information about the disease             | Specific               | Muscular dystrophy |
| MyMigraines                 | Patients and relatives                | Free | Work tools                                | Assessment             | Migraines          |
| MyPhysio                    | Professionals                         | Free | Information                               | Treatment              | All diseases       |
| My Epilepsy Diary           | Patients and                          | Free | Pain's diary                              | Assessment             | All diseases       |

|                                |                                       |      |                        |                            |              |
|--------------------------------|---------------------------------------|------|------------------------|----------------------------|--------------|
|                                | relatives                             |      |                        |                            |              |
| My Pain Diary                  | Patients and relatives                | Paid | Pain's diary           | Assessment                 | All diseases |
| Neuro Attention                | Patients and relatives                | Free | Memory treatment       | Treatment (Cognitive)      | All diseases |
| Neuro localizar (Neuro Locate) | Patients, relatives and professionals | Free | Information            | Informative                | All diseases |
| Neuro Rehab                    | Professionals                         | Free | Information            | Informative                | All diseases |
| Neuro12                        | Professionals                         | Free | Work tools             | Informative and assessment | All diseases |
| NeuroMind                      | Professionals                         | Free | Work tools             | Informative and assessment | All diseases |
| NeuroNation- brain exercise    | Patients and relatives                | Free | Working memory         | Treatment (Cognitive)      | All diseases |
| NeuroScores                    | Professionals                         | Free | Work tools             | Assessment                 | All diseases |
| Nicke + Running                | Patients and relatives                | Free | Improving lifestyle    | Healthy habits.            | All diseases |
| Occupational Therapy           | Professionals                         | Free | Therapeutic activities | Informative and Treatment  | All diseases |
| Osirix                         | Professionals                         | Paid | Work tools             | Assessment                 | All diseases |

|                                          |                                       |      |                                         |                 |                    |
|------------------------------------------|---------------------------------------|------|-----------------------------------------|-----------------|--------------------|
| Padmed                                   | Professionals                         | Free | Work tools                              | Informative     | All diseases       |
| Paralisia (facial paralysis)             | Patients and relatives                | Free | Treatment and understanding the disease | Specific        | facial paralysis   |
| Parent Project Muscular Dystrophy (PPMD) | Patients, relatives and professionals | Free | Information about the disease           | Specific        | Muscular dystrophy |
| Parkinson Disease                        | Patients, relatives and professionals | Free | Research information                    | Specific        | Parkinson          |
| Parkinson exercises                      | Patients, relatives and professionals | Paid | Treatment and understanding the disease | Specific        | Parkinson          |
| Parkinson's Central                      | Patients and relatives                | Free | Information about the disease           | Specific        | Parkinson          |
| Parkinson's Toolkit                      | Patients, relatives and professionals | Free | Treatment and understanding the disease | Specific        | Parkinson          |
| PhysioAdvisor Exercises                  | Professionals                         | Paid | Information                             | Treatment       | All diseases       |
| Physiotherapist                          | Patients, relatives and professionals | Free | Information and exercises               | Treatment       | All diseases       |
| Physiotherapy Exercises                  | Professionals                         | Free | Work tools                              | Informative and | All diseases       |

|                                |                        |      |                                             |                              |                      |
|--------------------------------|------------------------|------|---------------------------------------------|------------------------------|----------------------|
|                                |                        |      |                                             | treatment<br>(Physical)      |                      |
| Physiotherapy Help Guide       | Professionals          | Free | Information and exercises                   | Assessment and treatment     | All diseases         |
| Picto Connection               | Patients and relatives | Free | Improving lifestyle                         | Treatment and healthy habits | All diseases         |
| Pedometer                      | Patients and relatives | Free | Healthy habits (exercise)                   | Healthy habits               | All diseases         |
| Posture: Screen mobile         | Professionals          | Paid | Work tools                                  | Assessment                   | All diseases         |
| Prognosis                      | Professionals          | Free | Information                                 | Informative                  | All diseases         |
| Rancho Gait                    | Professionals          | Free | Work tools                                  | Assessment                   | All diseases         |
| Recognise Hands                | Professionals          | Paid | Work tools                                  | Treatment                    | All diseases         |
| Rehab TherX                    | Professionals          | Paid | Information                                 | Treatment                    | All diseases         |
| Rehabilitation for Lower Limbs | Professionals          | Free | Information                                 | Treatment                    | All diseases         |
| SAAC. Communication. Autism.   | Patients and relatives | Free | Improving healthy habits<br>(Communication) | Treatment<br>(Speech)        | Cognitive impairment |
| Sophie's Drawings              | Patients and relatives | Paid | Fine motor skills exercises                 | Treatment                    | Global developmental |

|                          |                                       |      |                                         |                                |                      |
|--------------------------|---------------------------------------|------|-----------------------------------------|--------------------------------|----------------------|
|                          |                                       |      |                                         |                                | delay                |
| Spaced Retrieval Therapy | Patients and relatives                | Paid | Memory exercises                        | Treatment (Cognitive)          | cognitive impairment |
| Spina Bífida             | Patients and relatives                | Free | Treatment and understanding the disease | Specific                       | Bifida spine         |
| Stretch Exercises        | Patients and relatives                | Free | Improving healthy habits (exercise)     | Informative and healthy habits | All diseases         |
| StretchingE              | Patients and relatives                | Free | Improving healthy habits (exercise)     | Informative and healthy habits | All diseases         |
| Stroke Patient           | Patients and relatives                | Free | Information about the disease           | Specific                       | Brain Damage         |
| Testes Ortopédicos       | Professionals                         | Free | orthopedic tests                        | Assessment                     | All diseases         |
| TF: Light Table          | Professionals                         | Free | Work tools                              | Assessment                     | All diseases         |
| Timer +                  | Professionals                         | Free | Work tools                              | Assessment                     | All diseases         |
| Tweri                    | Patients and relatives                | Free | Support for localization                | Healthy habits                 | All diseases         |
| Universal Doctor Speaker | Patients, relatives and professionals | Free | Medical translator                      | Assessment                     | All diseases         |
| Welvi                    | Patients and                          | Free | Improving lifestyle                     | Healthy habits                 | All diseases         |

| relatives           |               |      |             |             |              |  |
|---------------------|---------------|------|-------------|-------------|--------------|--|
| WonderMon- Manequin | Professionals | Free | Work tools  | Assessment  | All diseases |  |
| 3D Brain            | Professionals | Free | Information | Informative | All diseases |  |

Applications marked with gray are those belonging to the literature search databases.

Applications in white have been obtained from other sources.
